# Supplementary material for: Overweight Mice Show Coordinated Homeostatic and Hedonic Transcriptional Response across Brain
Source: eNeuro. 2019 Jan 8;5(6):ENEURO.0287-18.2018. doi: 10.1523/ENEURO.0287-18.2018 (PMC6327943; doi:10.1523/ENEURO.0287-18.2018)
Supplement: Extended Data 3-1 — Results for the REACTOME enrichment analysis. Download Extended Data 3-1, CSV file. [file sup_enu-eN-NWR-0287-18-s13.csv]

	Cluster	ID	Description	GeneRatio	BgRatio	pvalue	p.adjust	qvalue	geneID	Count
HT_DE	HT_DE	5991880	Olfactory Signaling Pathway	4/13	173/5515	0.000535659950896292	0.0230333778885406	0.0191709877162884	Olfr1349/Olfr170/Olfr171/Olfr319	4
HT_inflexibility.2	HT_inflexibility	5992143	Endosomal/Vacuolar pathway	1/1	22/5515	0.00398912058023559	0.0199909338168629	0.00233812091425297	Lnpep	1
HT_inflexibility.3	HT_inflexibility	5992121	Antigen processing: Ubiquitination & Proteasome degradation	1/1	39/5515	0.00707162284678142	0.0199909338168629	0.00233812091425297	Lnpep	1
HT_inflexibility.4	HT_inflexibility	1445146	Translocation of Glut4 to the Plasma Membrane	1/1	49/5515	0.00888485947416129	0.0199909338168629	0.00233812091425297	Lnpep	1
HT_bodyweight.10	HT_bodyweight	5992078	Meiotic recombination	8/90	42/5515	2.75443081088107e-07	3.7365411076757e-05	2.9719699583298e-05	Rpa1/Top3a/H3f3a/Hist1h4d/Hist1h4k/Hist1h4a/Hist1h4m/Hist1h4n	8
HT_bodyweight.12	HT_bodyweight	5991506	Chromosome Maintenance	9/90	58/5515	3.02798096366589e-07	3.7365411076757e-05	2.9719699583298e-05	Cenpi/Cenpu/Rpa1/Hist1h4d/Hist1h4k/Hist1h4a/Hist1h4m/Hist1h4n/Tert	9
HT_bodyweight.17	HT_bodyweight	5992312	HDMs demethylate histones	6/90	26/5515	2.82805223266464e-06	0.000141756118162315	0.000112749977170708	Hist1h4d/Hist1h4k/Hist1h4a/Hist1h4m/Hist1h4n/Kdm1b	6
HT_bodyweight.30	HT_bodyweight	5990980	Cell Cycle	19/90	419/5515	3.29745755754702e-05	0.000629657371703026	0.000500816862123683	Rad1/Cenpi/Alms1/Cenpu/Rpa1/Cdkn2c/Top3a/H3f3a/Hist1h4d/Hist1h4k/Hist1h4a/Fgfr1op/Hist1h4m/Hist1h4n/Ppp1cb/Ska2/Nup155/Tert/Bora	19
HT_bodyweight.34	HT_bodyweight	5992346	PKMTs methylate histone lysines	6/90	43/5515	5.99279506425503e-05	0.000961244328306507	0.000764554486092326	Eed/Hist1h4d/Hist1h4k/Hist1h4a/Hist1h4m/Hist1h4n	6
HT_bodyweight.40	HT_bodyweight	5992320	HATs acetylate histones	8/90	107/5515	0.000320338464720703	0.00414373304364522	0.00329584226860349	Taf12/H3f3a/Hist1h4d/Kat2b/Hist1h4k/Hist1h4a/Hist1h4m/Hist1h4n	8
HT_bodyweight.41	HT_bodyweight	5992334	HDACs deacetylate histones	5/90	38/5515	0.000339702032792232	0.00425689109842766	0.00338584591894889	Hist1h4d/Hist1h4k/Hist1h4a/Hist1h4m/Hist1h4n	5
HT_bodyweight.46	HT_bodyweight	5991424	Platelet homeostasis	5/90	49/5515	0.00112079430231696	0.0116650493208493	0.00927814659198669	Pde1a/Gna15/Nos2/Pla2g4a/Slc8a3	5
HT_bodyweight.49	HT_bodyweight	5991573	TGF-beta receptor signaling activates SMADs	4/90	30/5515	0.00131400720791718	0.0131729222593697	0.010477478526287	Pmepa1/Smad2/Ppp1cb/Cbl	4
HT_bodyweight.50	HT_bodyweight	5991209	RHO GTPase Effectors	10/90	205/5515	0.00172217893990293	0.0168437501195384	0.0133971814837122	Cenpi/Cenpu/H3f3a/Hist1h4d/Hist1h4k/Hist1h4a/Hist1h4m/Hist1h4n/Ppp1cb/Ska2	10
FC_DE.55	FC_DE	5991835	Class C/3 (Metabotropic glutamate/pheromone receptors)	5/133	21/5515	0.000112831226001771	0.0237509730733727	0.0237509730733727	Tas2r118/Tas2r113/Tas2r131/Tas2r109/Tas1r3	5
FC_DE.56	FC_DE	5991518	GPCR ligand binding	18/133	297/5515	0.000242440305299472	0.0340224561770259	0.0340224561770259	Tas2r118/Nmbr/Tas2r113/Tas2r131/Tas2r109/Cnr2/Ffar3/Ffar1/Ptch1/Tas1r3/Lhb/Fpr3/Npffr2/Nts/Ltb4r2/Mc5r/Opn4/Npy4r	18
FC_compulsivity	FC_compulsivity	5992177	Alpha-defensins	3/13	30/5515	4.00558429281246e-05	0.0013420534166467	0.00118152071130618	Defa25/Defa27/Defa28	3
FC_tot_intake	FC_tot_intake	5992362	Mitochondrial translation initiation	11/226	74/5515	0.000183053002536687	0.0422083548241506	0.0422083548241506	Mrpl54/Mrpl30/Mrps23/Mrpl58/Mrpl28/Mrpl39/Mrpl38/Mrpl55/Mrps18b/Mrps27/Mrpl11	11
ST_compulsivity	ST_compulsivity	5992122	Kinesins	2/5	18/5515	0.000100042866989933	0.00470201474852683	0.00168493249667255	Kifc1/Kifc5b	2
ST_eating_rate	ST_eating_rate	5992070	Factors involved in megakaryocyte development and platelet production	2/6	108/5515	0.00541409103738284	0.0433127282990627	0.031344737584848	Kifc1/Kifc5b	2
ST_tot_intake.68	ST_tot_intake	5991959	Regulation of the Fanconi anemia pathway	1/1	10/5515	0.00181323662737976	0.00664853430039266	NA	Zbtb32	1
ST_tot_intake.70	ST_tot_intake	5992392	Recognition of DNA damage by PCNA-containing replication complex	1/1	22/5515	0.00398912058023559	0.00664853430039266	NA	Zbtb32	1
