# Supplementary material for: Overweight Mice Show Coordinated Homeostatic and Hedonic Transcriptional Response across Brain
Source: eNeuro. 2019 Jan 8;5(6):ENEURO.0287-18.2018. doi: 10.1523/ENEURO.0287-18.2018 (PMC6327943; doi:10.1523/ENEURO.0287-18.2018)
Supplement: Extended Data 3-3 — Results for the Gene Ontology enrichment analysis. Download Extended Data 3-3, CSV file. [file sup_enu-eN-NWR-0287-18-s15.csv]

	Cluster	ID	Description	GeneRatio	BgRatio	pvalue	p.adjust	qvalue	geneID	Count
1	HT_DE	GO:0007608	sensory perception of smell	7/34	358/17024	5.65635400901549e-06	0.00255101565806598	0.00231017405841896	Olfr1349/Olfr549/Olfr170/Olfr171/Olfr319/Olfr94/Olfr116	7
31	HT_bodyweight	GO:0045653	negative regulation of megakaryocyte differentiation	5/361	14/17024	7.13279926326038e-06	0.0198719787474434	0.0198719787474434	Hist1h4d/Hist1h4k/Hist1h4a/Hist1h4m/Hist1h4n	5
35	FC_DE	GO:0007606	sensory perception of chemical stimulus	62/460	408/17024	4.37469216025703e-29	1.16541799149247e-25	1.16541799149247e-25	Tas2r118/Olfr15/Olfr1427/Olfr1349/Olfr545/Olfr549/Olfr611/Olfr612/Olfr620/Olfr622/Olfr67/Olfr1441/Olfr945/Olfr166/Olfr168/Olfr170/Olfr171/V1ra8/Vmn1r52/Olfr1097/Olfr1098/Olfr657/Olfr830/Olfr212/Olfr843/Tas2r113/Tas2r109/Olfr1303/Olfr1466/Olfr1030/Olfr1257/Olfr870/Olfr1148/Olfr417/Olfr700/Olfr704/Taar4/Gm10081/Olfr715/Olfr470/Olfr478/Olfr504/Olfr1415/Olfr1341/Olfr522/Olfr524/Olfr1211/Tas1r3/Olfr31…	62
49	ST_inflexibility	GO:0006342	chromatin silencing	11/224	83/17024	1.12595485341113e-08	1.73343573230008e-05	1.73343573230008e-05	Hist2h2ac/Hist2h2aa2/Hist2h2aa1/H2afj/Hist1h2af/Hist1h2ab/Hist1h2an/Hist1h2ao/Hist1h2ah/Supt6/Hist1h2al	11
50	ST_inflexibility	GO:0045814	negative regulation of gene expression, epigenetic	11/224	86/17024	1.64853612201624e-08	1.73343573230008e-05	1.73343573230008e-05	Hist2h2ac/Hist2h2aa2/Hist2h2aa1/H2afj/Hist1h2af/Hist1h2ab/Hist1h2an/Hist1h2ao/Hist1h2ah/Supt6/Hist1h2al	11
56	ST_compulsivity	GO:0016458	gene silencing	5/16	176/17024	4.44400786686063e-07	9.35190544769721e-05	6.58741262243808e-05	Ncbp2/Uhrf1/H2afj/Hist1h2ak/Supt6	5
57	ST_compulsivity	GO:0006342	chromatin silencing	4/16	83/17024	9.14257426688368e-07	9.35190544769721e-05	6.58741262243808e-05	Uhrf1/H2afj/Hist1h2ak/Supt6	4
58	ST_compulsivity	GO:0045814	negative regulation of gene expression, epigenetic	4/16	86/17024	1.05472617831172e-06	9.35190544769721e-05	6.58741262243808e-05	Uhrf1/H2afj/Hist1h2ak/Supt6	4
70	ST_tot_intake	GO:0046651	lymphocyte proliferation	2/2	249/17024	0.000213085215535461	0.00524837767865149	0.000298627463934651	Slamf6/Zbtb32	2
71	ST_tot_intake	GO:0032943	mononuclear cell proliferation	2/2	250/17024	0.000214803644693005	0.00524837767865149	0.000298627463934651	Slamf6/Zbtb32	2
72	ST_tot_intake	GO:0070661	leukocyte proliferation	2/2	258/17024	0.0002287995255424	0.00524837767865149	0.000298627463934651	Slamf6/Zbtb32	2
73	ST_tot_intake	GO:0042110	T cell activation	2/2	376/17024	0.000486543195208252	0.00524837767865149	0.000298627463934651	Slamf6/Zbtb32	2
74	ST_tot_intake	GO:0070489	T cell aggregation	2/2	376/17024	0.000486543195208252	0.00524837767865149	0.000298627463934651	Slamf6/Zbtb32	2
75	ST_tot_intake	GO:0071593	lymphocyte aggregation	2/2	377/17024	0.000489138092249363	0.00524837767865149	0.000298627463934651	Slamf6/Zbtb32	2
76	ST_tot_intake	GO:0070486	leukocyte aggregation	2/2	382/17024	0.000502216097283684	0.00524837767865149	0.000298627463934651	Slamf6/Zbtb32	2
77	ST_tot_intake	GO:0007159	leukocyte cell-cell adhesion	2/2	406/17024	0.000567392181475836	0.00524837767865149	0.000298627463934651	Slamf6/Zbtb32	2
3	HT_DE	GO:0004984	olfactory receptor activity	7/34	331/16935	3.494592503478e-06	0.000213170142712158	0.000180247402810971	Olfr1349/Olfr549/Olfr170/Olfr171/Olfr319/Olfr94/Olfr116	7
4	HT_inflexibility	GO:0070006	metalloaminopeptidase activity	1/11	12/16935	0.00776923740646684	0.0297030980677915	0.0129143904642572	Lnpep	1
5	HT_inflexibility	GO:0050998	nitric-oxide synthase binding	1/11	19/16935	0.0122759112004422	0.0297030980677915	0.0129143904642572	Nos1ap	1
6	HT_inflexibility	GO:0010296	prenylcysteine methylesterase activity	1/11	20/16935	0.0129182004518491	0.0297030980677915	0.0129143904642572	Abhd15	1
7	HT_inflexibility	GO:0018731	1-oxa-2-oxocycloheptane lactonase activity	1/11	20/16935	0.0129182004518491	0.0297030980677915	0.0129143904642572	Abhd15	1
8	HT_inflexibility	GO:0018732	sulfolactone hydrolase activity	1/11	20/16935	0.0129182004518491	0.0297030980677915	0.0129143904642572	Abhd15	1
9	HT_inflexibility	GO:0018734	butyrolactone hydrolase activity	1/11	20/16935	0.0129182004518491	0.0297030980677915	0.0129143904642572	Abhd15	1
10	HT_inflexibility	GO:0034892	endosulfan lactone lactonase activity	1/11	20/16935	0.0129182004518491	0.0297030980677915	0.0129143904642572	Abhd15	1
11	HT_inflexibility	GO:0035460	L-ascorbate 6-phosphate lactonase activity	1/11	20/16935	0.0129182004518491	0.0297030980677915	0.0129143904642572	Abhd15	1
12	HT_inflexibility	GO:0043905	Ser-tRNA(Thr) hydrolase activity	1/11	20/16935	0.0129182004518491	0.0297030980677915	0.0129143904642572	Abhd15	1
13	HT_inflexibility	GO:0043906	Ala-tRNA(Pro) hydrolase activity	1/11	20/16935	0.0129182004518491	0.0297030980677915	0.0129143904642572	Abhd15	1
14	HT_inflexibility	GO:0043907	Cys-tRNA(Pro) hydrolase activity	1/11	20/16935	0.0129182004518491	0.0297030980677915	0.0129143904642572	Abhd15	1
15	HT_inflexibility	GO:0043908	Ser(Gly)-tRNA(Ala) hydrolase activity	1/11	20/16935	0.0129182004518491	0.0297030980677915	0.0129143904642572	Abhd15	1
16	HT_inflexibility	GO:0047376	all-trans-retinyl-palmitate hydrolase, all-trans-retinol forming activity	1/11	20/16935	0.0129182004518491	0.0297030980677915	0.0129143904642572	Abhd15	1
17	HT_inflexibility	GO:0052767	mannosyl-oligosaccharide 1,6-alpha-mannosidase activity	1/11	20/16935	0.0129182004518491	0.0297030980677915	0.0129143904642572	Abhd15	1
18	HT_inflexibility	GO:0052768	mannosyl-oligosaccharide 1,3-alpha-mannosidase activity	1/11	20/16935	0.0129182004518491	0.0297030980677915	0.0129143904642572	Abhd15	1
19	HT_inflexibility	GO:0080030	methyl indole-3-acetate esterase activity	1/11	20/16935	0.0129182004518491	0.0297030980677915	0.0129143904642572	Abhd15	1
20	HT_inflexibility	GO:0080031	methyl salicylate esterase activity	1/11	20/16935	0.0129182004518491	0.0297030980677915	0.0129143904642572	Abhd15	1
21	HT_inflexibility	GO:0080032	methyl jasmonate esterase activity	1/11	20/16935	0.0129182004518491	0.0297030980677915	0.0129143904642572	Abhd15	1
22	HT_inflexibility	GO:0018733	3,4-dihydrocoumarin hydrolase activity	1/11	21/16935	0.01356010998747	0.0297030980677915	0.0129143904642572	Abhd15	1
23	HT_inflexibility	GO:0050253	retinyl-palmitate esterase activity	1/11	21/16935	0.01356010998747	0.0297030980677915	0.0129143904642572	Abhd15	1
24	HT_inflexibility	GO:0051723	protein methylesterase activity	1/11	21/16935	0.01356010998747	0.0297030980677915	0.0129143904642572	Abhd15	1
43	FC_DE	GO:0004984	olfactory receptor activity	50/451	331/16935	9.89280106076159e-24	5.60921820145182e-21	5.60921820145182e-21	Olfr15/Olfr1427/Olfr1349/Olfr545/Olfr549/Olfr611/Olfr612/Olfr620/Olfr622/Olfr67/Olfr1441/Olfr945/Olfr166/Olfr168/Olfr170/Olfr171/Olfr1097/Olfr1098/Olfr657/Olfr830/Olfr212/Olfr843/Olfr1303/Olfr1466/Olfr1030/Olfr1257/Olfr870/Olfr1148/Olfr417/Olfr700/Olfr704/Gm10081/Olfr715/Olfr470/Olfr478/Olfr504/Olfr1415/Olfr1341/Olfr522/Olfr524/Olfr1211/Olfr319/Olfr738/Olfr1221/Olfr901/Olfr91/Olfr94/Olfr96/Olfr12…	50
48	FC_inflexibility	GO:0004984	olfactory receptor activity	24/501	331/16935	5.2679127484847e-05	0.0401941742709382	0.0386498440599351	Olfr1427/Olfr549/Olfr577/Olfr629/Olfr945/Olfr166/Olfr168/Olfr1284/Olfr212/Olfr843/Olfr149/Olfr372/Olfr713/Olfr17/Olfr224/Olfr522/Olfr738/Olfr47/Olfr905/Olfr821/Olfr94/Olfr96/Olfr97/Olfr116	24
67	ST_compulsivity	GO:0031491	nucleosome binding	2/16	50/16935	0.000998426087782361	0.0409109380431894	0.0338865405707177	Uhrf1/Supt6	2
68	ST_compulsivity	GO:0003777	microtubule motor activity	2/16	58/16935	0.00134134223092424	0.0409109380431894	0.0338865405707177	Kifc1/Kifc5b	2
140	ST_tot_intake	GO:0003714	transcription corepressor activity	1/1	149/16935	0.00879834661942736	0.0251550044286978	NA	Zbtb32	1
141	ST_tot_intake	GO:0003712	transcription cofactor activity	1/1	372/16935	0.0219663418954829	0.0251550044286978	NA	Zbtb32	1
142	ST_tot_intake	GO:0000989	transcription factor activity, transcription factor binding	1/1	421/16935	0.0248597578978447	0.0251550044286978	NA	Zbtb32	1
143	ST_tot_intake	GO:0000988	transcription factor activity, protein binding	1/1	426/16935	0.0251550044286978	0.0251550044286978	NA	Zbtb32	1
32	HT_bodyweight	GO:0000781	chromosome, telomeric region	11/363	125/17217	6.82915470498642e-05	0.0123865985354518	0.0123865985354518	Rpa1/Tnks2/H3f3a/Hist1h4d/Hist1h4k/Hist1h4a/Hist1h4m/Hist1h4n/Ppp1cb/Thoc7/Tert	11
33	HT_bodyweight	GO:0000784	nuclear chromosome, telomeric region	10/363	105/17217	7.48434956824885e-05	0.0123865985354518	0.0123865985354518	Rpa1/H3f3a/Hist1h4d/Hist1h4k/Hist1h4a/Hist1h4m/Hist1h4n/Ppp1cb/Thoc7/Tert	10
53	ST_inflexibility	GO:0000790	nuclear chromatin	15/223	304/17217	1.0505959132753e-05	0.00303622218936562	0.0029527274615211	Ncapd3/Cdca5/Hist2h2ac/Hist2h2aa2/Hist2h2aa1/Stat3/H2afj/Hist1h2af/Hist1h2ab/Hist1h2an/Timeless/Hist1h2ao/Hist1h2ah/Rad51ap1/Hist1h2al	15
60	ST_compulsivity	GO:0005875	microtubule associated complex	3/16	121/17217	0.000177360266661974	0.00762021762962332	0.00542979069965063	Dnaaf2/Kifc1/Kifc5b	3
61	ST_compulsivity	GO:0032993	protein-DNA complex	3/16	133/17217	0.000234468234757641	0.00762021762962332	0.00542979069965063	H2afj/Kcnip3/Hist1h2ak	3
69	ST_bodyweight	GO:0031966	mitochondrial membrane	10/85	472/17217	0.000108422406893365	0.0175644299167252	0.0156356523625169	Ndufb5/Dnajc11/Bcl2/Mcu/Cox11/Mtch2/Ndufa3/Dmpk/Crat/Cstad	10
